# Supplementary material for: Implementation research training for learners in low- and middle-income countries: Evaluating behavior change after participating in a massive online open course
Source: Research Square preprint supplement (doi:10.21203/rs.3.rs-105115/v1), 2020-11-18
Supplement: Supplementary file 1 [file f3b975b50712a2779abe108c.docx]

Criteria for describing and evaluating training interventions in healthcare professions – CRe-DEPTH

|  | Item No | Recommendation | Page No |
| --- | --- | --- | --- |
| **Development of training** |  |  |  |
|  | 1 | Description of the aim or objectives of the training | 5 |
|  | 2 | Description of the underlying theoretical framework | 5 |
|  | 3 | Description of the developmental process | 5 |
|  | 4 | Description of target population and setting of the training | 5 |
|  | 5 | Description of the educational resources | 5 |
| **Characteristics of the training** |  |  |  |
|  | 6 | Description of the content of the training | 5 |
|  | 7 | Description of the format | 5 |
|  | 8 | Description of the didactic methods of training | 5 |
|  | 9 | Description of tailoring of the training | 5 |
| **Characteristics of the providers/trainers** |  |  |  |
|  | 10 | Description of the providers of the training | 5 |
| **Assessment of the training outcomes** |  |  |  |
|  | 11 | Description of the measured outcomes | 7 |
|  | 12 | Description of the applied assessment method | 8 |

| Main results | 16 | (*a*) Give unadjusted estimates and, if applicable, confounder-adjusted estimates and their precision (eg, 95% confidence interval). Make clear which confounders were adjusted for and why they were included |  |
| --- | --- | --- | --- |
| (*b*) Report category boundaries when continuous variables were categorized |  |
| (*c*) If relevant, consider translating estimates of relative risk into absolute risk for a meaningful time period |  |
| Other analyses | 17 | Report other analyses done—eg analyses of subgroups and interactions, and sensitivity analyses |  |
| Discussion | | | |
| Key results | 18 | Summarise key results with reference to study objectives |  |
| Limitations | 19 | Discuss limitations of the study, taking into account sources of potential bias or imprecision. Discuss both direction and magnitude of any potential bias |  |
| Interpretation | 20 | Give a cautious overall interpretation of results considering objectives, limitations, multiplicity of analyses, results from similar studies, and other relevant evidence |  |
| Generalisability | 21 | Discuss the generalisability (external validity) of the study results |  |
| Other information | | | |
| Funding | 22 | Give the source of funding and the role of the funders for the present study and, if applicable, for the original study on which the present article is based |  |

*Give information separately for exposed and unexposed groups.

**Note:** An Explanation and Elaboration article discusses each checklist item and gives methodological background and published examples of transparent reporting. The STROBE checklist is best used in conjunction with this article (freely available on the Web sites of PLoS Medicine at http://www.plosmedicine.org/, Annals of Internal Medicine at http://www.annals.org/, and Epidemiology at http://www.epidem.com/). Information on the STROBE Initiative is available at http://www.strobe-statement.org.
